# Supplementary material for: A simple approximation for larval retention around reefs
Source: Springer Nature journal article supplement (doi:10.1007/s00338-011-0749-z), 2011-04-18
Supplement: MOESM2 [file 338_2011_749_MOESM2_ESM.doc]

Appendix

Table A1. Regression parameters with 95% confidence bounds, coefficient of determination (R2), F statistic, p value and likelihood ratio (G) for the regression models between the Island Wake Parameter (*I*) and Residence time for different unidirectional flow speeds obtained with the rectangular shaped reefs data. *G*>3.841 indicates statistically significant support for a non-zero value of *c*. *F* statistics indicated that all reported regressions were highly statistically significant (*p*<<0.01 in all cases)

|  | **Velocity**  **(ms-1)** | **G** | **a**  **(95% cb)** | **-b**  **(95% cb)** | **R2** | **F** | **P value** |
| --- | --- | --- | --- | --- | --- | --- | --- |
| **Rectangular reefs** | **0.1038** | 2.7437 | 3.18  (2.73 3.63) | 0.79  (0.56 1.03) | 0.85 | 22.67 | 0.0008 |
| **0.1245** | 2.6573 | 3.54  (2.92 4.15) | 0.90  (0.64 1.15) | 0.86 | 23.94 | 0.0006 |
| **0.1641** | 2.4908 | 4.65  (3.55 5.75) | 1.08  (0.80 1.37) | 0.89 | 27.08 | 0.0004 |
| **0.2020** | 1.9857 | 6.07  (4.36 2.92) | 1.22  (0.93 1.50) | 0.92 | 29.90 | 0.0003 |
| **0.3109** | 0.6866 | 8.89  (4.92 12.86) | 1.27  (0.95 1.60) | 0.91 | 23.71 | 0.0007 |
| **0.4410** | 0.1795 | 9.32  (3.21 15.43) | 1.17  (0.78 1.56) | 0.86 | 15.11 | 0.003 |
| **0.6573** | 0.0421 | 11.67  (1.63 21.70) | 1.21  (0.77 1.66) | 0.84 | 12.09 | 0.006 |

Table A.2 Regression parameters with 95% confidence bounds, coefficient of determination (R2), F statistic, p value and likelihood ratio (G) for the regression models between the Island Wake Parameter (*I*) and Residence time for different flow regimes (with and without tides), obtained with the rectangular shaped reefs data. *G*>3.841 indicates statistically significant support for a non-zero value of *c*. *F* statistics indicated that all reported regressions were highly statistically significant (*p*<<0.01 in all cases)

|  | **Circulation regime** | **G** | **c**  **(95% cb)** | **a**  **(95% cb)** | **-b**  **(95% cb)** | **R2** | **F** | **P value** |
| --- | --- | --- | --- | --- | --- | --- | --- | --- |
| **Rectangular reefs** | **wU/sU** | 0.046 | NA | 3.33  (2.89 3.76) | 0.77  (0.61 0.94) | 0.82 | 49.46 | <0.001 |
| **wUwT** | 12.77 | 0.90  (0.60 1.20) | 2.42  (2.03 2.82) | 1.59  (0.99 2.21) | 0.96 | 98.25 | <0.001 |
| **wUsT/sUsT** | 0.86 | NA | 2.03  (1.28 2.79) | 0.34  (0.16 0.53) | 0.40 | 16.08 | <0.001 |

Table A.3 Regression parameters with 95% confidence bounds, coefficient of determination (R2), F statistic, p value and likelihood ratio (G) for the regression models between the Island Wake Parameter (*I*) and Residence time for different reef shapes (triangular, rectangular and kidney), obtained pooling all flow regimes (*wU, sU, wUwT, wUsT,* and *sUsT*). *G*>3.841 indicates statistically significant support for a non-zero value of *c*. *F* statistics indicated that all reported regressions were highly statistically significant (*p*<<0.01 in all cases)

|  | **Reef**  **Shape** | **G** | **c**  **(95% cb)** | **a**  **(95% cb)** | **-b**  **(95% cb)** | **R2** | **F** | **P value** |
| --- | --- | --- | --- | --- | --- | --- | --- | --- |
| **All circulation regimes** | **Triangles** | 4.20 | 0.47  (-0.69 1.63) | 3.21  (2.02 4.40) | 1.15  (0.21 2.08) | 0.72 | 35.25 | <0.001 |
| **Rectangles** | 6.22 | 0.62  (0.38 0.87) | 2.64  (2.30 2.98) | 1.11  (0.79 1.42) | 0.81 | 128 | <0.001 |
| **Kidneys** | 4.81 | 0.47  (-0.29 1.23) | 3.60  (2.70 4.50) | 1.03  (0.63 1.44) | 0.86 | 111.77 | <0.001 |
